# Supplementary material for: Land Use Change Net Removals Associated with Sugarcane in Brazil
Source: MDPI journal article supplement (doi:10.3390/land12030584), 2023-02-28
Supplement: s1 [file s1]

Article:

# Land use change net removals associated with sugarcane in Brazil

Marjorie M. Guarenghi, Danilo F.T. Garofalo, Joaquim E.A. Seabra, Marcelo M.R. Moreira, Renan M.L. Novaes, Nilza Patrícia Ramos, Sandra F. Nogueira, and Cristiano A. de Andrade

## Supplementary Material S1

### Distribution of excluded and evaluated CARs

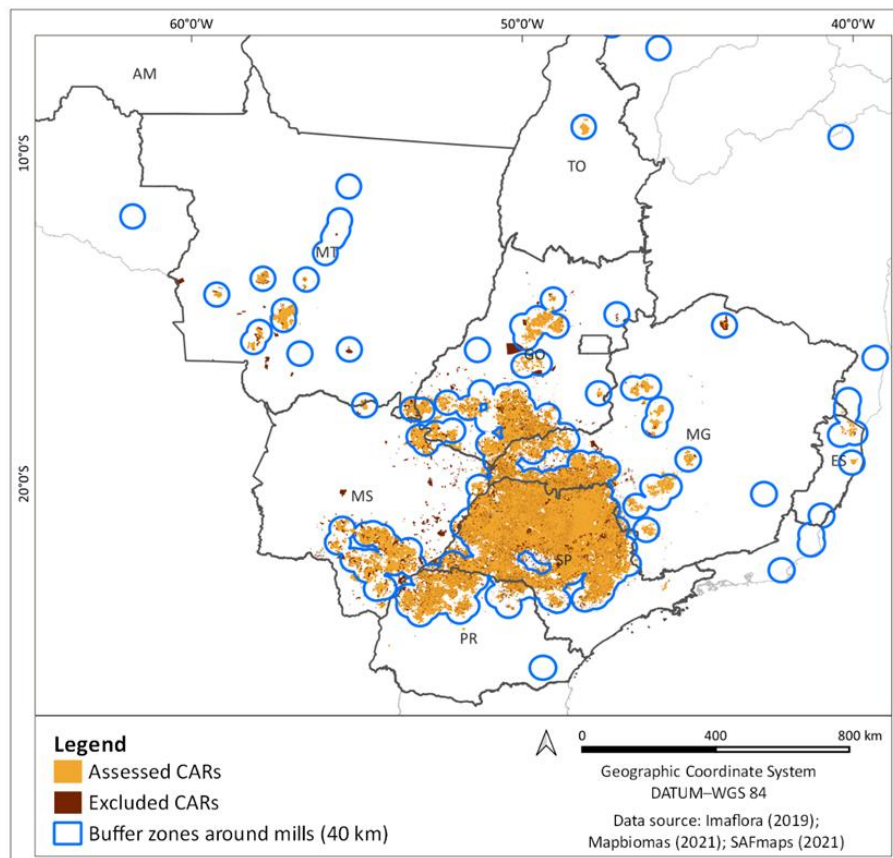

**Figure S1.** Distribution of evaluated CARs and excluded CARs in the rural properties database verification stage. It was excluded CARs with a mapped sugarcane area of less than 2 hectares; CARs whose area mapped with sugarcane was formed by small scattered pixels, which did not represent a sugarcane plot profile, or which, based on a visual assessment, were identified as mistakenly mapped as sugarcane by automatic land use classification; and CARs located in municipalities that have no sugarcane production, according to the official source for national agricultural production (IBGE, 2022). These criteria led to the exclusion of some large CAR areas for example in GO and MS states, which present very low sugarcane cultivation areas. The excluded areas represent approximately 0.5% of the sugarcane area mapped by MapBiomas within the CARs in the considered states. The data that support the findings of this study are available from the corresponding author on request.

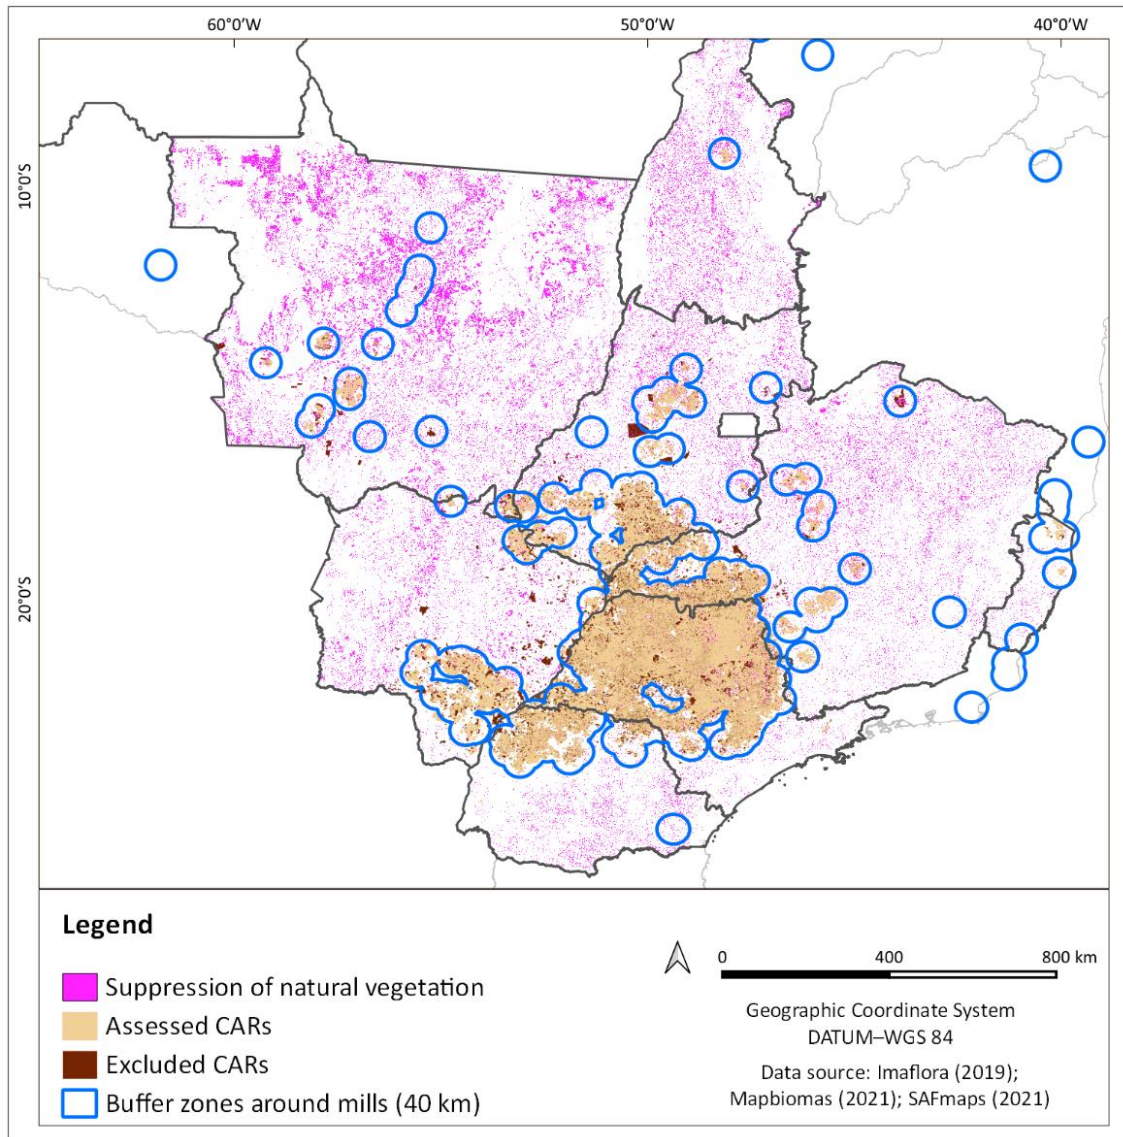

**Figure S2.** Location of evaluated CARs and excluded CARs in the database verification stage of rural properties, combined with the occurrence of suppression of natural vegetation that occurred between 2000 and 2020, in the evaluated states with the highest concentration of CARs. It was excluded CARs with a mapped sugarcane area of less than 2 hectares; CARs whose area mapped with sugarcane was formed by small scattered pixels, which did not represent a sugarcane plot profile, or which, based on a visual assessment, were identified as mistakenly mapped as sugarcane by automatic land use classification; and CARs located in municipalities that have no sugarcane production, according to the official source for national agricultural production (IBGE, 2022). These criteria led to the exclusion of some large CAR areas for example in GO and MS states, which present very low sugarcane cultivation areas. The excluded areas represent approximately 0.5% of the sugarcane area mapped by MapBiomas within the CARs in the considered states.



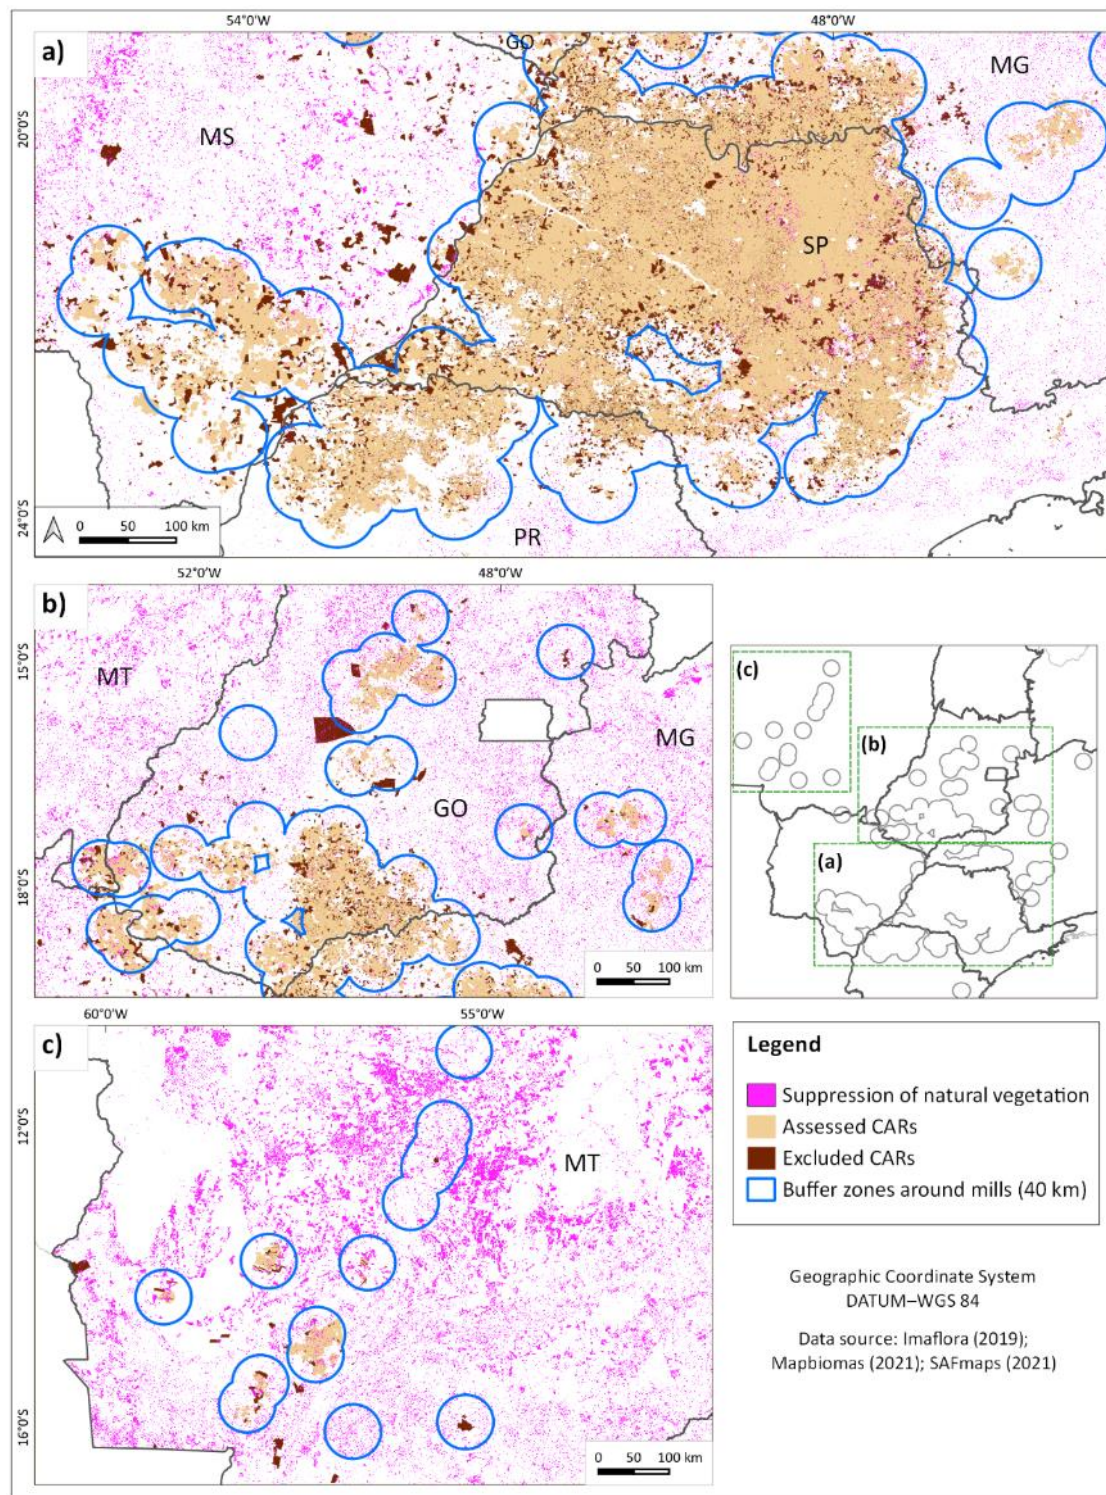

**Figure S3.** Details of the main regions where CARs were excluded in the database verification stage of rural properties. It was excluded CARs with a mapped sugarcane area of less than 2 hectares; CARs whose area mapped with sugarcane was formed by small scattered pixels, which did not represent a sugarcane plot profile, or which, based on a visual assessment, were identified as mistakenly mapped as sugarcane by automatic land use classification; and CARs located in municipalities that have no sugarcane production, according to the official source for national agricultural production (IBGE, 2022).

### Comparison of MapBiomias mapping with industry data

A correspondence of 84.7% was observed between the areas mapped as "sugarcane" according to MapBiomias, in 2020, and the spatialized sugarcane data provided by the industry (Raizen, 2021), in accordance with the global accuracy of the MapBiomias mapping; the other sugarcane areas provided by the industry were predominantly classified as Mosaic by MapBiomias (Figure S4).

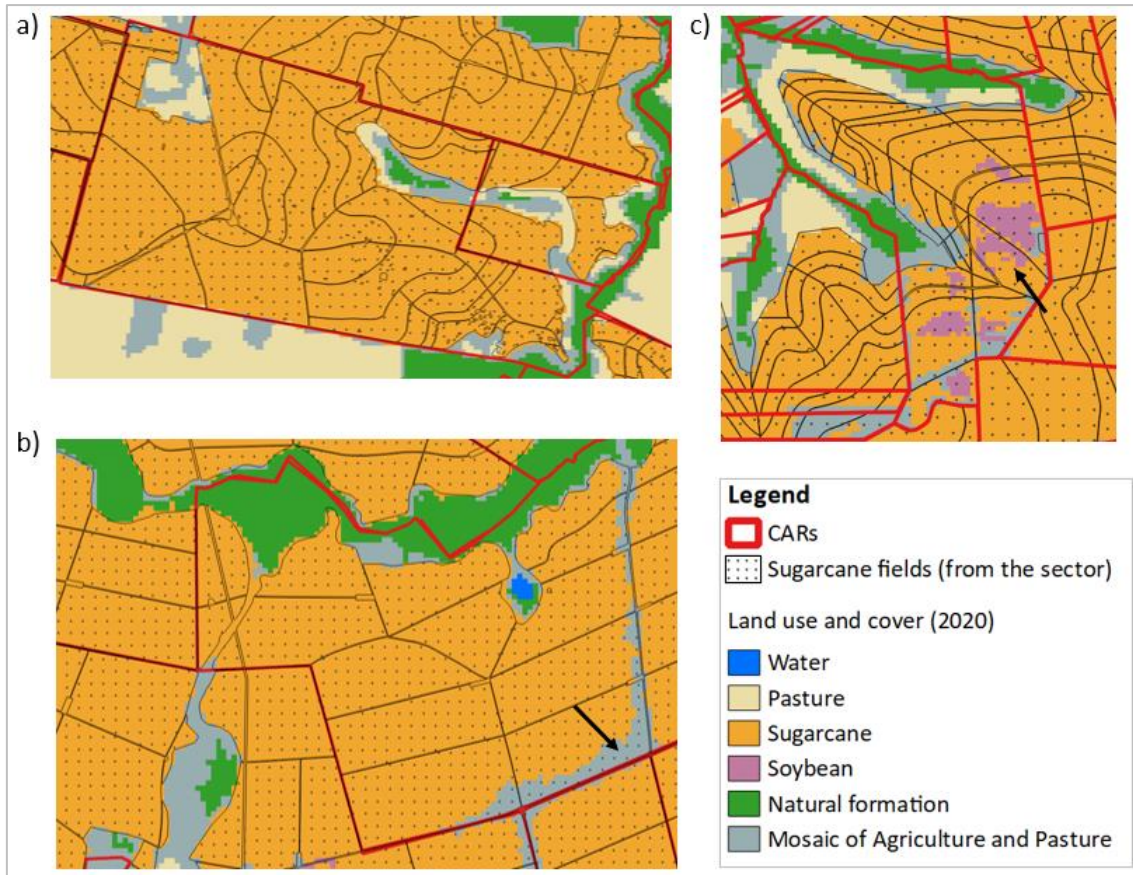

**Figure S4.** Comparisons between MapBiomias land use and land cover mapping (based on Landsat satellite images) and the location of sugarcane fields provided by the industry. Emphasis on cases in which the sugarcane mapped by MapBiomias presents accuracy with the plots throughout the CAR (a), or in which areas of sugarcane plots were mapped as a mosaic of agriculture or pasture (b), or soy (c) according to MapBiomias.



## Land use and land cover data

**Table S1.** Areas of land uses and land covers in all CARs of the analyzed region, in 2000, by state. Areas are in hectares x 1000.

| Class\State                       | SP      | GO     | MT     | MS     | MG      | PR     | TO    | ES    | AM    | TOTAL   |
|-----------------------------------|---------|--------|--------|--------|---------|--------|-------|-------|-------|---------|
| Sugarcane                         | 2206.79 | 3.64   | 18.13  | 0.71   | 70.27   | 90.57  | 1.10  | 0.00  | -     | 2391.21 |
| Mosaic of Agriculture and Pasture | 1959.29 | 275.92 | 5.50   | 170.58 | 333.88  | 172.03 | 5.52  | 2.93  | -     | 2925.64 |
| Forest Formation                  | 675.70  | 175.05 | 79.34  | 147.83 | 135.90  | 93.08  | 4.52  | 1.22  | 53.05 | 1365.69 |
| Pasture                           | 3657.45 | 938.03 | 186.32 | 943.34 | 1055.81 | 491.75 | 2.87  | 23.47 | 3.78  | 7302.83 |
| Soybean                           | 100.08  | 198.98 | 49.13  | 76.71  | 35.10   | 21.66  | 9.23  | -     | -     | 490.89  |
| Wetland                           | 149.59  | 58.25  | 18.26  | 68.20  | 41.58   | 3.20   | 0.15  | 0.19  | 0.02  | 339.43  |
| Savanna Formation                 | 90.27   | 148.83 | 56.00  | 60.11  | 127.70  | -      | 25.54 | -     | 0.04  | 508.50  |
| Other Temporary Crops             | 303.33  | 350.29 | 33.62  | 78.58  | 190.29  | 173.34 | 2.53  | -     | 0.00  | 1131.99 |
| Forest Plantation                 | 14.60   | 0.60   | 0.04   | 0.01   | 5.55    | 0.90   | -     | 0.25  | -     | 21.95   |
| Grassland                         | 12.50   | 11.76  | 24.15  | 7.44   | 34.39   | -      | 1.76  | -     | 1.12  | 93.12   |
| Citrus                            | 31.87   | -      | -      | -      | -       | -      | -     | -     | -     | 31.87   |
| River, Lake and Ocean             | 21.81   | 5.80   | 1.18   | 3.09   | 3.62    | 0.96   | 0.02  | 0.14  | 0.01  | 36.63   |
| Urban Area                        | 6.39    | 0.22   | 0.10   | 0.09   | 0.38    | 0.50   | 0.12  | 0.01  | -     | 7.81    |
| Other Perennial Crops             | 0.46    | -      | -      | -      | -       | -      | -     | -     | -     | 0.46    |
| Other non Vegetated Areas         | 4.22    | 8.15   | 0.35   | 0.43   | 0.75    | 0.18   | 1.08  | 0.01  | -     | 15.18   |
| Coffee                            | 7.14    | 0.49   | -      | -      | 3.36    | 3.61   | -     | 0.01  | -     | 14.60   |
| Other land uses <sup>1</sup>      | 0.15    | -      | -      | -      | -       | -      | -     | 0.06  | -     | 0.21    |
| Total                             | 9,242   | 2,176  | 472    | 1,557  | 2,039   | 1,052  | 54    | 28    | 58    | 16,678  |

<sup>1</sup> Mining, Rocky Outcrop, Aquaculture, Wooded Restinga and Other non Forest Formations.

**Table S2.** Areas of land uses and land covers in all CARs of the analyzed region, in 2008, by state. Areas are in hectares x 1000.

| Class\State                       | SP      | GO     | MT     | MS     | MG     | PR     | TO    | ES    | AM    | TOTAL  |
|-----------------------------------|---------|--------|--------|--------|--------|--------|-------|-------|-------|--------|
| Sugarcane                         | 4008.63 | 163.87 | 56.15  | 94.20  | 359.03 | 352.16 | 0.10  | 0.04  | 4.39  | 5,039  |
| Mosaic of Agriculture and Pasture | 2126.98 | 307.08 | 6.11   | 249.40 | 404.66 | 239.10 | 0.97  | 4.10  | -     | 3,338  |
| Forest Formation                  | 714.71  | 175.10 | 80.33  | 145.36 | 137.65 | 101.73 | 4.75  | 1.36  | 52.65 | 1,414  |
| Pasture                           | 1897.16 | 705.60 | 126.45 | 720.84 | 699.43 | 236.58 | 2.60  | 22.04 | 0.84  | 4,412  |
| Soybean                           | 52.32   | 331.23 | 41.69  | 168.20 | 66.14  | 36.75  | 18.18 | -     | -     | 715    |
| Wetland                           | 147.95  | 57.39  | 14.67  | 67.90  | 39.97  | 3.21   | 0.15  | 0.32  | 0.00  | 332    |
| Savanna Formation                 | 83.49   | 136.01 | 54.91  | 53.57  | 116.78 | -      | 20.49 | -     | 0.00  | 465    |
| Other Temporary Crops             | 118.51  | 275.06 | 69.91  | 46.05  | 167.67 | 78.65  | 6.21  | -     | 0.03  | 762    |
| Forest Plantation                 | 15.76   | 0.74   | 0.07   | 0.18   | 1.99   | 0.44   | 0.00  | 0.18  | -     | 19     |
| Grassland                         | 11.34   | 12.35  | 19.97  | 8.03   | 36.13  | -      | 0.60  | 0.00  | 0.11  | 89     |
| Citrus                            | 22.61   | -      | -      | -      | -      | -      | -     | -     | -     | 23     |
| River, Lake and Ocean             | 20.24   | 6.78   | 1.23   | 2.56   | 4.08   | 0.85   | 0.02  | 0.15  | 0.01  | 36     |
| Urban Area                        | 9.31    | 0.75   | 0.13   | 0.35   | 0.83   | 0.74   | 0.12  | 0.01  | -     | 12     |
| Other Perennial Crops             | 0.57    | -      | -      | -      | 0.18   | -      | -     | -     | -     | 1      |
| Other non Vegetated Areas         | 4.76    | 3.80   | 0.49   | 0.47   | 1.06   | 0.26   | 0.24  | 0.01  | -     | 11     |
| Coffee                            | 7.06    | 0.26   | -      | -      | 3.18   | 1.32   | -     | 0.04  | -     | 12     |
| Other land uses <sup>1</sup>      | 0.24    | -      | -      | -      | -      | -      | -     | 0.05  | -     | 0      |
| Total                             | 9,242   | 2,176  | 472    | 1,557  | 2,039  | 1,052  | 54    | 28    | 58    | 16,678 |

<sup>1</sup> Mining, Rocky Outcrop, Aquaculture, Wooded Restinga and Other non Forest Formations.

**Table S3.** Areas of land uses and land covers in all CARs of the analyzed region, in 2020, by state. Areas are in hectares x 1000.

| Class\State                       | SP      | GO     | MT     | MS     | MG     | PR     | TO    | ES    | AM    | TOTAL    |
|-----------------------------------|---------|--------|--------|--------|--------|--------|-------|-------|-------|----------|
| Sugarcane                         | 5546.36 | 808.80 | 116.78 | 602.93 | 819.81 | 542.45 | 10.08 | 0.69  | 4.27  | 8,452.19 |
| Mosaic of Agriculture and Pasture | 1673.07 | 404.50 | 17.79  | 243.75 | 437.93 | 227.47 | 7.34  | 3.84  | -     | 3,015.68 |
| Forest Formation                  | 755.90  | 179.62 | 86.97  | 150.21 | 146.33 | 110.87 | 5.77  | 1.43  | 52.83 | 1,489.93 |
| Pasture                           | 715.02  | 347.74 | 112.64 | 224.40 | 312.76 | 96.79  | 4.67  | 21.41 | 0.76  | 1,836.19 |
| Soybean                           | 127.43  | 193.24 | 35.78  | 187.96 | 88.96  | 55.29  | 4.71  | -     | -     | 693.36   |
| Wetland                           | 152.81  | 54.88  | 12.29  | 70.16  | 38.19  | 3.98   | 0.15  | 0.25  | 0.00  | 332.70   |
| Savanna Formation                 | 58.38   | 112.41 | 48.37  | 44.68  | 104.75 | -      | 19.14 | -     | 0.00  | 387.74   |
| Other Temporary Crops             | 45.50   | 46.37  | 15.27  | 17.81  | 38.37  | 9.07   | 1.54  | -     | 0.01  | 173.94   |
| Forest Plantation                 | 37.05   | 3.14   | 0.26   | 2.17   | 5.16   | 2.05   | -     | 0.34  | -     | 50.18    |
| Grassland                         | 9.34    | 12.47  | 23.74  | 8.53   | 34.93  | 0.00   | 0.54  | 0.00  | 0.14  | 89.68    |
| Citrus                            | 55.61   | -      | -      | -      | -      | -      | -     | -     | -     | 55.61    |
| River, Lake and Ocean             | 16.91   | 6.25   | 1.05   | 2.46   | 3.46   | 0.74   | 0.02  | 0.11  | 0.00  | 31.00    |
| Urban Area                        | 13.67   | 1.36   | 0.30   | 0.63   | 1.38   | 1.00   | 0.12  | 0.01  | -     | 18.46    |
| Other Perennial Crops             | 10.47   | -      | -      | -      | 0.89   | -      | -     | -     | -     | 11.37    |
| Other non Vegetated Areas         | 6.86    | 5.10   | 0.87   | 1.43   | 1.51   | 0.88   | 0.37  | 0.00  | -     | 17.02    |
| Coffee                            | 16.95   | 0.11   | -      | -      | 4.16   | 1.19   | -     | 0.09  | -     | 22.51    |
| Other land uses <sup>1</sup>      | 0.23    | -      | -      | -      | 0.00   | -      | -     | 0.11  | -     | 0.34     |
| Total                             | 9,242   | 2,176  | 472    | 1,557  | 2,039  | 1,052  | 54    | 28    | 58    | 16,678   |

<sup>1</sup> Mining, Rocky Outcrop, Aquaculture, Wooded Restinga and Other non Forest Formations.

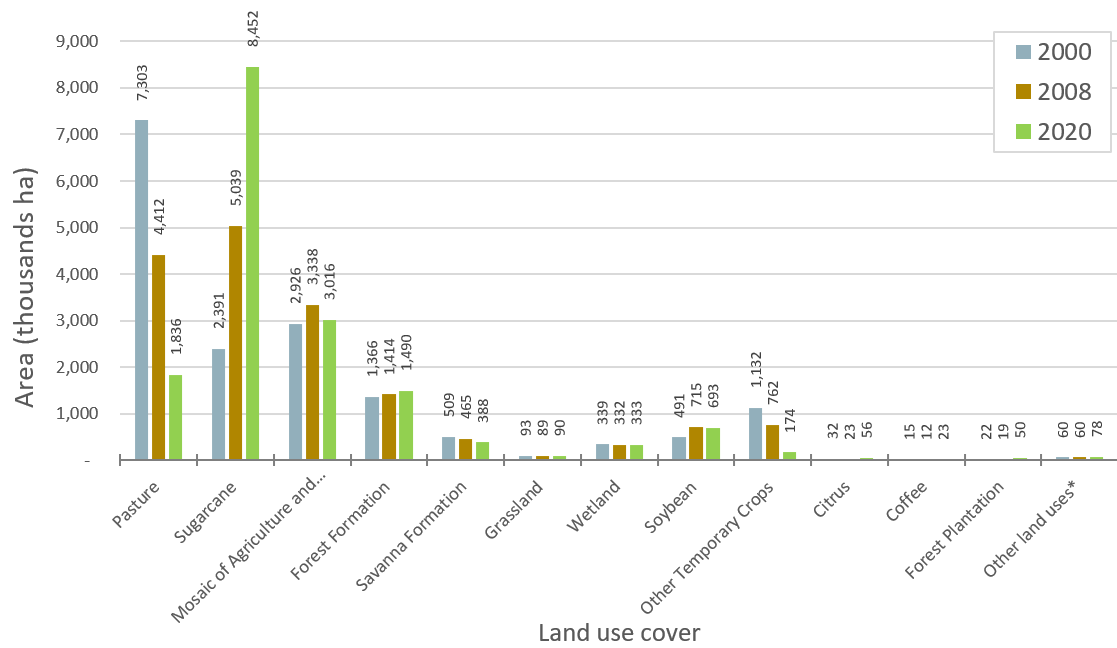

**Figure S5.** Area of land use and land cover in all CARs of the analyzed region, in the years 2000, 2008 and 2000. \*Other land uses: include Aquaculture; Mining; Other non Forest Formations; Other non Vegetated Areas; Other Perennial Crops; River, Lake and Ocean; Rocky Outcrop; Urban Area; Wooded Restinga



**Table S4.** Dynamics of native vegetation cover in all CARs

| Natural Vegetation | Area (ha) |           |           | Variation (2000 – 2020) |       | Variation (2008 – 2020) |       |
|--------------------|-----------|-----------|-----------|-------------------------|-------|-------------------------|-------|
|                    | 2000      | 2008      | 2020      | ha                      | %     | ha                      | %     |
| Forest Formation   | 1,365,686 | 1,413,621 | 1,489,925 | 124,239                 | 9.1   | 76,304                  | 5.4   |
| Savanna Formation  | 508,500   | 465,248   | 387,745   | -120,755                | -23.7 | -77,503                 | -16.7 |
| Grassland          | 93,118    | 88,518    | 89,681    | -3,437                  | -3.7  | 1,163                   | 1.3   |
| Total              | 1,967,304 | 1,967,387 | 1,967,351 | 47                      | 0.0   | - 36                    | 0.0   |
| Wetland            | 339,432   | 331,559   | 332,703   | -6,729                  | -2.0  | 1,144                   | 0.3   |
| Total              | 2,306,736 | 2,298,947 | 2,300,054 | -6,682                  | -0.3  | 1,107                   | 0.0   |

**Table S5.** Dynamics of changes between natural vegetation and sugarcane classes.

| Sugarcane’s advance over natural vegetation areas |           |           |                                        |           |                                           | Recovery of sugarcane areas into natural vegetation |           |         |
|---------------------------------------------------|-----------|-----------|----------------------------------------|-----------|-------------------------------------------|-----------------------------------------------------|-----------|---------|
|                                                   | Area (ha) |           | % of total sugarcane area <sup>1</sup> |           | % of sugarcane expanded area <sup>2</sup> |                                                     | Area (ha) |         |
|                                                   | 2000 – 20 | 2008 – 20 | 2000 – 20                              | 2008 – 20 | 2000 – 20                                 | 2008 – 20                                           | 2000-20   | 2008-20 |
| Forest Formation                                  | 52,835    | 35,170    | 0.63%                                  | 0.42%     | 0.84%                                     | 0.88%                                               | 8,297     | 8,482   |
| Grassland                                         | 14,330    | 6,535     | 0.17%                                  | 0.08%     | 0.23%                                     | 0.16%                                               | 1,123     | 2,326   |
| Savanna Formation                                 | 61,060    | 32,163    | 0.72%                                  | 0.38%     | 0.97%                                     | 0.80%                                               | 697       | 1,094   |
| Wetland                                           | 5,650     | 2,540     | 0.07%                                  | 0.03%     | 0.09%                                     | 0.06%                                               | 992       | 1,948   |
| Total                                             | 133,874   | 76,408    | 1.58%                                  | 0.90%     | 2.12%                                     | 1.91%                                               | 11,109    | 13,851  |

<sup>1</sup>Relative percentage considering the total sugarcane area in 2020

<sup>2</sup>Relative percentage considering the total sugarcane area in 2020, excluding the areas that already had sugarcane at the beginning of the period

**Table S6.** Sugarcane expansion (2020) over land uses as of 2000. Areas are in hectares x 1000

| <b>From</b>        | <b>Total</b> | <b>SP</b> | <b>MG</b> | <b>PR</b> | <b>MT</b> | <b>MS</b> | <b>GO</b> | <b>TO</b> | <b>ES</b> | <b>AM</b> |
|--------------------|--------------|-----------|-----------|-----------|-----------|-----------|-----------|-----------|-----------|-----------|
| Sugarcane          | 2,139.77     | 2,000.41  | 57.04     | 67.66     | 10.84     | 0.58      | 2.85      | 0.40      | -         | -         |
| Pasture            | 3,759.71     | 2,156.30  | 463.45    | 271.65    | 60.43     | 456.24    | 347.56    | 0.90      | 0.63      | 2.54      |
| Mosaic             | 1,371.79     | 989.26    | 132.42    | 77.37     | 1.08      | 58.49     | 111.34    | 1.78      | 0.05      | -         |
| Natural Vegetation | 133.87       | 61.11     | 21.33     | 1.73      | 13.39     | 13.59     | 19.17     | 1.82      | 0.00      | 1.73      |
| Temporary Crops    | 1,010.82     | 311.07    | 144.25    | 121.97    | 31.06     | 73.96     | 323.69    | 4.83      | -         | 0.00      |
| Perennial Crop     | 23.83        | 19.28     | 0.44      | 1.77      | -         | -         | 0.01      | -         | 0.00      | -         |
| Forest Plantation  | 6.57         | 5.46      | 0.72      | 0.28      | -         | -         | 0.09      | -         | 0.02      | -         |
| Other              | 5.71         | 1.01      | 0.15      | 0.02      | 0.01      | 0.07      | 4.10      | 0.35      | -         | -         |

**Table S7.** Sugarcane expansion (2020) over land uses as of 2008. Areas are in hectares x 1000

| <b>From</b>        | <b>Total</b> | <b>SP</b> | <b>MG</b> | <b>PR</b> | <b>MT</b> | <b>MS</b> | <b>GO</b> | <b>TO</b> | <b>ES</b> | <b>AM</b> |
|--------------------|--------------|-----------|-----------|-----------|-----------|-----------|-----------|-----------|-----------|-----------|
| Sugarcane          | 4,455.03     | 3642.29   | 296.93    | 281.02    | 35.48     | 70.93     | 124.09    | 0.07      | -         | 4.22      |
| Pasture            | 1,755.84     | 848.14    | 228.39    | 97.94     | 27.52     | 327.19    | 225.77    | 0.27      | 0.62      | 0.02      |
| Mosaic             | 1,361.49     | 894.63    | 148.51    | 100.23    | 0.87      | 107.99    | 109.04    | 0.16      | 0.06      | -         |
| Natural Vegetation | 76.41        | 48.52     | 7.24      | 0.66      | 8.08      | 3.83      | 7.79      | 0.24      | 0.00      | 0.04      |
| Temporary Crops    | 787.33       | 98.94     | 138.09    | 62.21     | 44.83     | 92.97     | 341.05    | 9.24      | -         | 0.00      |
| Perennial Crop     | 10.29        | 9.75      | 0.17      | 0.36      | -         | -         | 0.01      | -         | -         | -         |
| Forest Plantation  | 3.21         | 2.94      | 0.20      | 0.00      | 0.00      | -         | 0.05      | -         | 0.01      | -         |
| Other              | 2.40         | 0.98      | 0.27      | 0.02      | 0.01      | 0.02      | 1.00      | 0.10      | -         | 0.00      |

Although sugarcane expansion in the state of Amazonas occurred predominantly over pastures and natural vegetation, the reduction of vegetation in the CARs due to sugarcane reduced significantly after 2008 (1.730 ha between 2000 – 20, and 39 ha between 2008 – 20) (Figure 5). The sugarcane production in this state is destined for the production of sugar and occupies only 4,275 ha (2020).

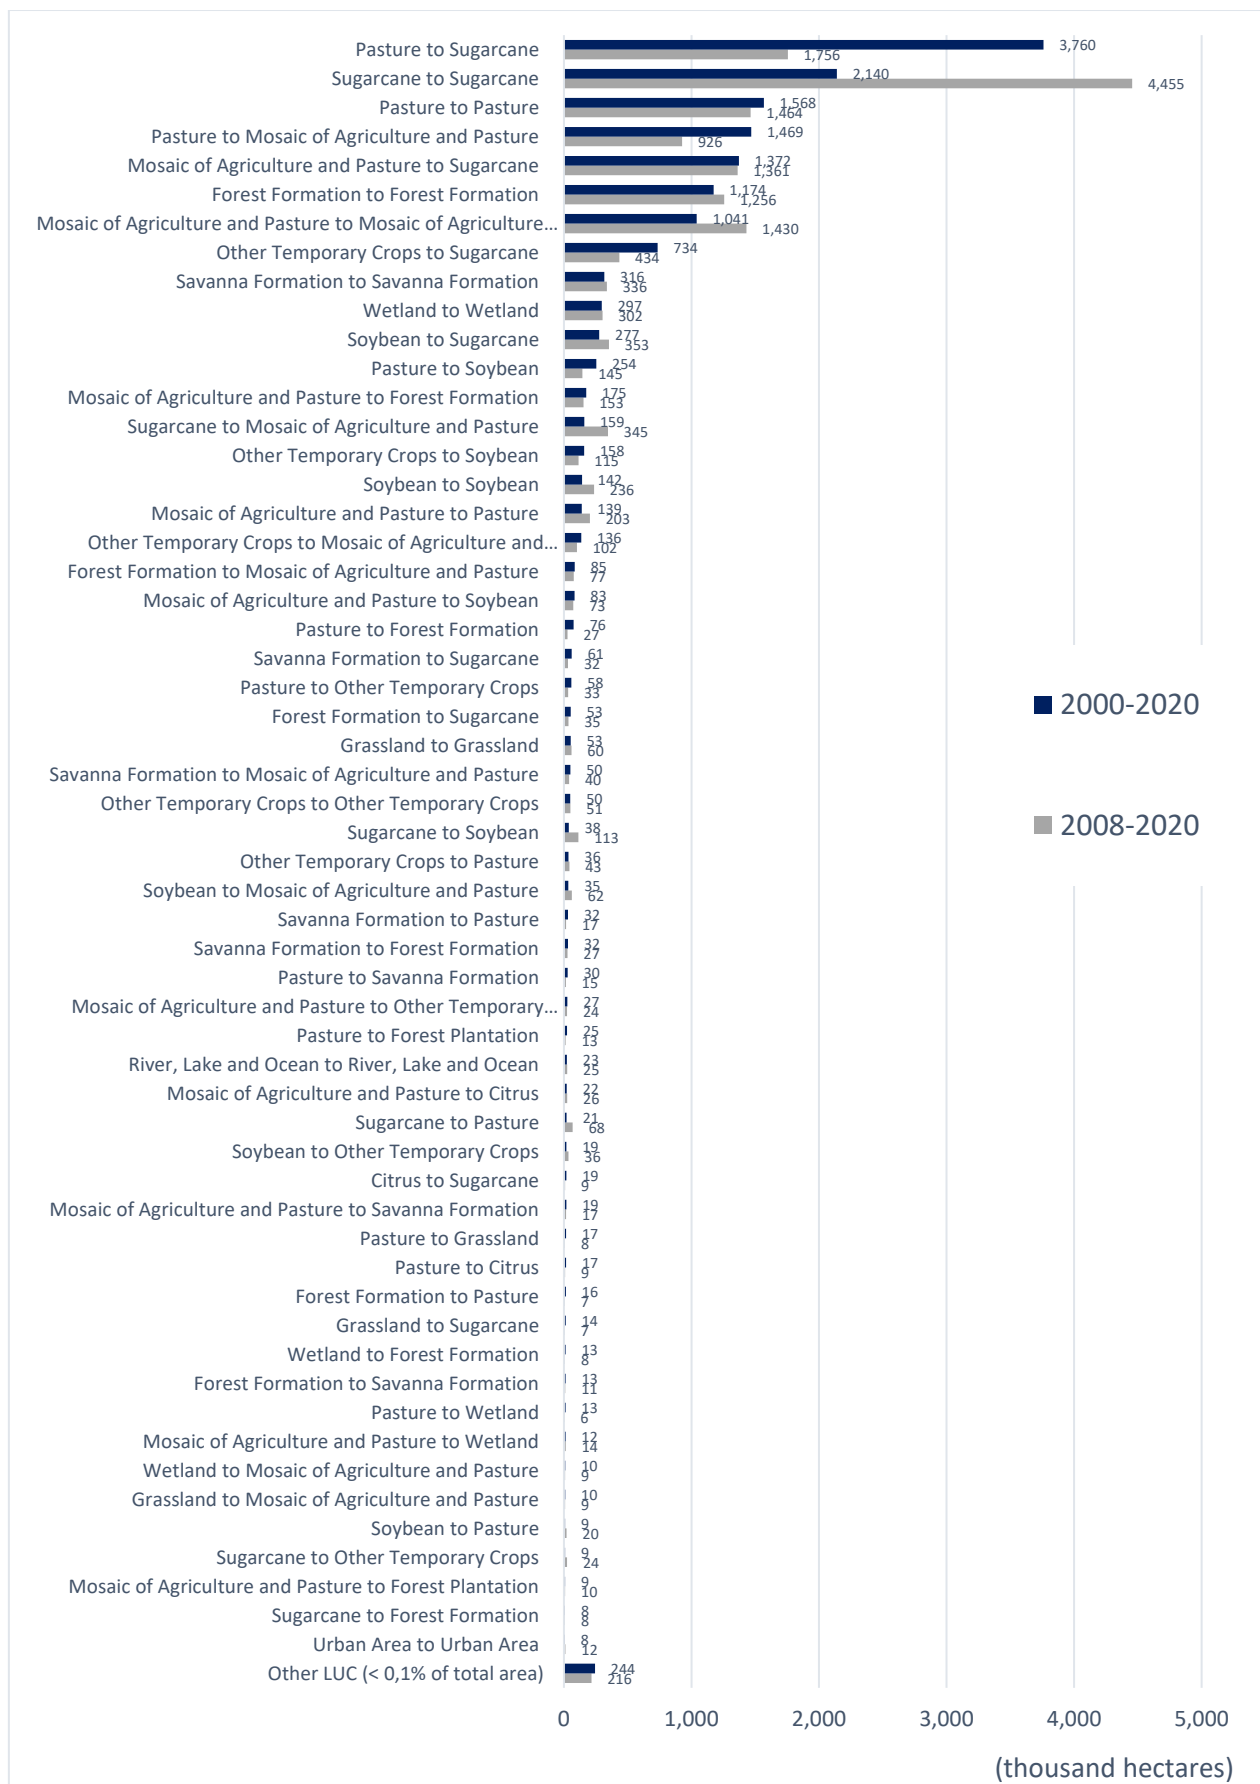

Figure S6. LUC between 2000 – 2020 and 2008 – 2020 in the CARs.

**Table S8.** History of mechanized harvesting of sugarcane in 2000s harvest seasons (%)

|        | 2000/01 | 01/02 | 02/03 | 03/04 | 04/05 | 05/06 | 06/07 | 07/08 | 08/09 | 09/10 | 10/11 | 11/12 | 12/13 | 13/14 | 14/15 | 15/16 | 16/17 | 17/18 | 18/19 | 19/20 | 20/21 | 21/22 | 22/23 <sup>(1)</sup> |
|--------|---------|-------|-------|-------|-------|-------|-------|-------|-------|-------|-------|-------|-------|-------|-------|-------|-------|-------|-------|-------|-------|-------|----------------------|
| AM     | 0.0     | 0.0   | 0.0   | 0.0   | 0.0   | 0.0   | 0.0   | 80.0  | 61.5  | 63.7  | 63.0  | 85.4  | 95.5  | 95.1  | 98.4  | 100.0 | 100.0 | 100.0 | 100.0 | 100.0 | 100.0 | 100.0 | 100.0                |
| TO     | 0.0     | 0.0   | 0.0   | 0.0   | 0.0   | 0.0   | 0.0   | 35.0  | 36.0  | 50.0  | 100.0 | 100.0 | 100.0 | 100.0 | 100.0 | 100.0 | 100.0 | 100.0 | 100.0 | 100.0 | 100.0 | 100.0 | 100.0                |
| MT     | 0.0     | 0.0   | 0.0   | 0.0   | 0.0   | 0.0   | 0.0   | 33.3  | 46.3  | 57.3  | 64.3  | 75.1  | 77.9  | 80.0  | 87.3  | 97.7  | 92.5  | 91.7  | 92.7  | 93.6  | 93.6  | 100.0 | 100.0                |
| MS     | 0.0     | 0.0   | 0.0   | 0.0   | 0.0   | 0.0   | 0.0   | 20.0  | 34.3  | 63.3  | 80.6  | 89.9  | 87.2  | 99.9  | 90.8  | 95.8  | 99.8  | 99.1  | 99.9  | 100.0 | 100.0 | 100.0 | 100.0                |
| GO     | 0.0     | 0.0   | 0.0   | 0.0   | 0.0   | 0.0   | 0.0   | 31.5  | 48.8  | 64.7  | 75.8  | 79.6  | 83.5  | 88.0  | 84.4  | 91.8  | 95.9  | 95.8  | 96.0  | 96.3  | 98.5  | 97.8  | 97.8                 |
| MG     | 0.0     | 0.0   | 0.0   | 0.0   | 0.0   | 0.0   | 0.0   | 19.4  | 37.5  | 47.5  | 61.5  | 73.2  | 80.3  | 80.0  | 84.8  | 98.0  | 97.0  | 99.5  | 99.8  | 95.2  | 93.3  | 97.9  | 97.5                 |
| ES     | 0.0     | 0.0   | 0.0   | 0.0   | 0.0   | 0.0   | 0.0   | 12.7  | 11.7  | 22.3  | 19.3  | 39.6  | 50.6  | 63.5  | 65.0  | 70.3  | 60.8  | 73.8  | 75.1  | 82.2  | 86.0  | 80.9  | 80.0                 |
| SP     | 30.5    | 29.0  | 28.0  | 26.0  | 28.0  | 28.0  | 34.5  | 33.0  | 47.6  | 58.6  | 62.7  | 72.2  | 77.7  | 81.3  | 85.1  | 94.5  | 94.5  | 95.9  | 93.3  | 97.2  | 98.3  | 96.9  | 99.3                 |
| PR     | 0.0     | 0.0   | 0.0   | 0.0   | 0.0   | 0.0   | 0.0   | 10.4  | 18.4  | 26.9  | 42.0  | 48.3  | 59.1  | 65.3  | 72.8  | 74.7  | 86.6  | 86.1  | 79.4  | 97.3  | 94.2  | 95.6  | 98.4                 |
| Brazil | 15.8    | 15.0  | 14.6  | 13.6  | 14.7  | 15.6  | 19.7  | 24.4  | 37.1  | 47.6  | 55.1  | 63.7  | 69.2  | 74.0  | 76.8  | 85.1  | 89.8  | 90.2  | 91.6  | 91.8  | 89.4  | 89.4  | 90.5                 |

Elaborated by authors based on Packer et al. (2015), from 2000 to 2006, and Conab (2022), from 2007 to 2020. <sup>(1)</sup> Estimated in April, 2022.



**Table S9.** Total, net and gross emission/removal due to all LUCs in the CARs (2000–2020), and the percentual of gross removals/emissions due to LUC related to sugarcane cultivation.

| Total emission/removal resulting from the conversion of use (tCO <sub>2</sub> .year <sup>-1</sup> ) – Period 2000–2020 |                       |                    |                   |                   |                   |                      |                   |                 | Net emission/<br>removal<br>(tCO <sub>2</sub> .yr <sup>-1</sup> ) | Total gross<br>emissions<br>(tCO <sub>2</sub> .yr <sup>-1</sup> ) | Total gross<br>removals<br>(tCO <sub>2</sub> .yr <sup>-1</sup> ) |
|------------------------------------------------------------------------------------------------------------------------|-----------------------|--------------------|-------------------|-------------------|-------------------|----------------------|-------------------|-----------------|-------------------------------------------------------------------|-------------------------------------------------------------------|------------------------------------------------------------------|
| FROM (2000)<br>TO (2020)                                                                                               | Natural<br>vegetation | Pasture            | Sugarcane         | Temporary<br>Crop | Perennial<br>Crop | Forest<br>Plantation | Mosaic            | Other           |                                                                   |                                                                   |                                                                  |
| Natural vegetation                                                                                                     | -                     | -1,933,101         | -189,606          | -221,844          | -15,690           | -21,607              | -3,528,475        | -156,619        | -6,066,943                                                        | 0                                                                 | -6,066,943                                                       |
| Pasture                                                                                                                | 561,285               | -869,947           | 1,039             | -35,210           | 4,308             | 3,489                | -58,887           | -8,868          | -402,790                                                          | 570,121                                                           | -972,911                                                         |
| Sugarcane                                                                                                              | 1,611,133             | -6,297,497         | -1,887,716        | -1,727,429        | 82,433            | 22,367               | -1,577,482        | -52,335         | -9,826,525                                                        | 1,715,934                                                         | -11,542,459                                                      |
| Temporary Crop                                                                                                         | 244,000               | 57,582             | 31,083            | -                 | 13,580            | 22,389               | 31,532            | -9,359          | 390,807                                                           | 400,166                                                           | -9,359                                                           |
| Perennial Crop                                                                                                         | 136,201               | -127,381           | -22,217           | -17,107           | -                 | -20                  | -121,061          | -179            | -151,765                                                          | 136,201                                                           | -287,966                                                         |
| Forest Plantation                                                                                                      | 48,910                | -119,230           | -15,126           | -9,391            | 166               | -                    | -37,376           | -347            | -132,394                                                          | 49,076                                                            | -181,470                                                         |
| Mosaic                                                                                                                 | 1,917,332             | -1,785,189         | -127,879          | -219,149          | 18,439            | 11,290               | -1,039,951        | -84,780         | -1,309,885                                                        | 1,947,061                                                         | -3,256,947                                                       |
| Other                                                                                                                  | 115,434               | 64,426             | 22,172            | 28,701            | -6,199            | 560                  | 72,069            | -3              | 297,160                                                           | 303,363                                                           | -6,203                                                           |
| <b>TOTAL</b>                                                                                                           | <b>4,634,296</b>      | <b>-11,010,336</b> | <b>-2,188,250</b> | <b>-2,201,429</b> | <b>97,037</b>     | <b>38,469</b>        | <b>-6,259,630</b> | <b>-312,491</b> | <b>-17,202,336</b>                                                | <b>4,769,802</b>                                                  | <b>-21,972,137</b>                                               |
| % of gross removals due to sugarcane cultivation <sup>1</sup>                                                          | -                     | 54.6%              | 16.4%             | 15.0%             | -                 | -                    | 13.7%             | 0.5%            |                                                                   |                                                                   |                                                                  |
| % of gross emissions due to sugarcane cultivation <sup>2</sup>                                                         | 93.9%                 | -                  | -                 | -                 | 4.8%              | 1.3%                 | -                 | -               |                                                                   |                                                                   |                                                                  |
| % of gross removals due to the respective LUC <sup>3</sup>                                                             |                       | 50.1%              | 10.0%             | 10.0%             |                   |                      | 28.5%             | 1.4%            |                                                                   |                                                                   |                                                                  |
| % of gross emissions due to the respective LUC <sup>4</sup>                                                            | 97.2%                 |                    |                   |                   | 2.0%              | 0.8%                 |                   |                 |                                                                   |                                                                   |                                                                  |

<sup>1</sup> For example, the sugarcane expansion over pastures promoted a removal of -6,297,497 tCO<sub>2</sub>.year<sup>-1</sup>, which corresponds to 54.5% of the total gross removals due to sugarcane cultivation (-11,542,459 tCO<sub>2</sub>.year<sup>-1</sup>).

<sup>2</sup> For example, the sugarcane expansion over natural vegetation was responsible for the emission of 1,611,133 tCO<sub>2</sub>.year<sup>-1</sup>, which corresponds to 93.9% of the total gross removals due to sugarcane cultivation (1,715,934 tCO<sub>2</sub>.year<sup>-1</sup>).

<sup>3</sup> For example, all LUCs over pastures were responsible for the removal of -11,010,336 tCO<sub>2</sub>.year<sup>-1</sup>, which corresponds to 50.1% of the total gross removals due to LUC that provided removals (-21,972,137 tCO<sub>2</sub>.year<sup>-1</sup>, the sum of the negative values in the line "TOTAL").

<sup>4</sup> For example, all LUCs over natural vegetation were responsible for the emission of 4,634,296 tCO<sub>2</sub>.year<sup>-1</sup>, which corresponds to 97.2% of the total gross emissions due to LUC that provided removals (4,769,802 tCO<sub>2</sub>.year<sup>-1</sup>, the sum of the positive values in the line "TOTAL").
